# Supplementary material for: ISOC1 Modulates Inflammatory Responses in Macrophages through the AKT1/PEX11B/Peroxisome Pathway
Source: MDPI journal article supplement (doi:10.3390/molecules27185896), 2022-09-11
Supplement: s1 [file s1]

# ISOC1 modulates inflammatory responses in macrophages through the AKT1 /PEX11B/ peroxisome pathway

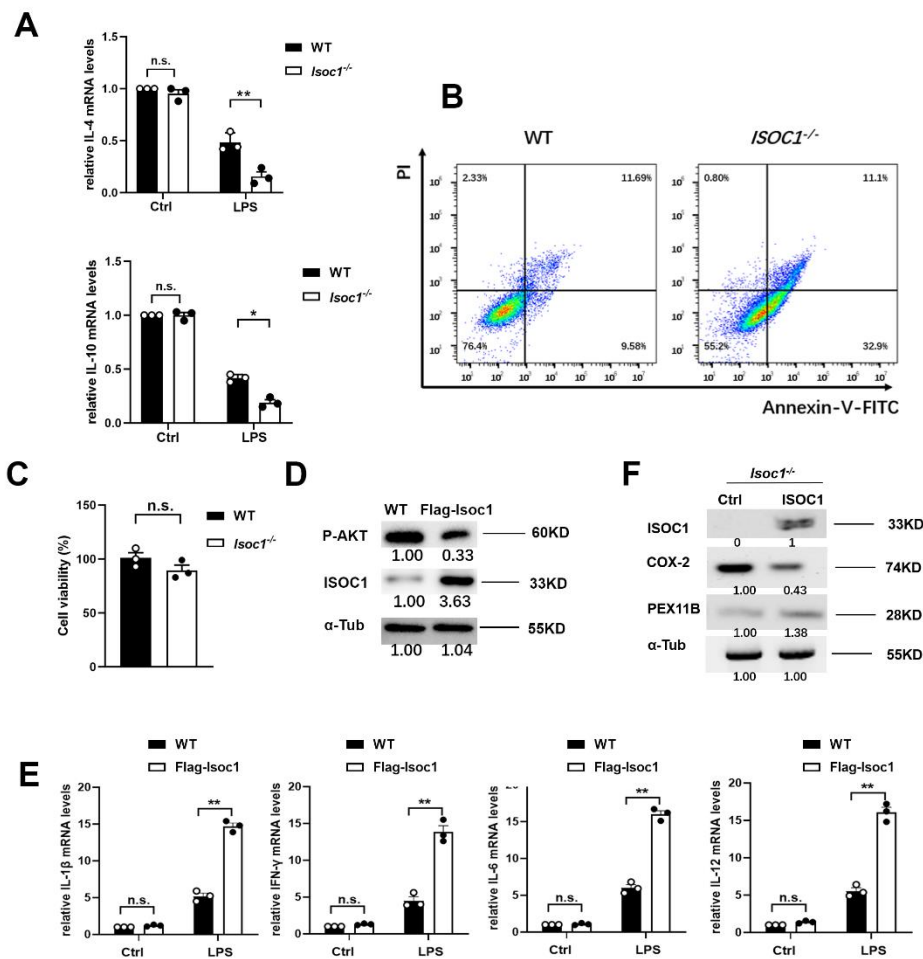

**Figure S1. *ISOC1*<sup>-/-</sup> results a higher apoptosis rate and *Isoc1* overexpression promotes inflammation after LPS treatment.**

**A, B** Wild type and *Isoc1* deficient RAW264.7 cells were stimulated with 300 ng/mL LPS for 24 hours. The mRNA levels of anti-inflammatory factors were detected by qRT-PCR (**A**), and the levels of apoptosis were detected by flow cytometry (**B**). **C** Cell proliferation was assayed by a CCK-8 kit in WT or *Isoc1*<sup>-/-</sup> cells after LPS treatment. **D, E** RAW264.7 macrophages were transfected with the Flag- labeled

Isoc1 vector for 12 hours, and were stimulated with 300 ng/mL LPS for 24 hours. The levels of ISOC1 and P-AKT1 were detected by WB (D), and mRNA levels of inflammatory factors was detected by qRT-PCR (E). F ISOC1 was overexpressed in *Isoc1*<sup>-/-</sup> cells after LPS treatment, and the levels of COX-2 and PEX11B were detected by WB. A single data point represented one technical repeat. All data are shown as mean  $\pm$  s.e.m (n = 3). \**P*<0.05, \*\**P*<0.01. Student t test or Two-way ANOVA followed by Bonferroni post *hoc* test was used for data analysis.

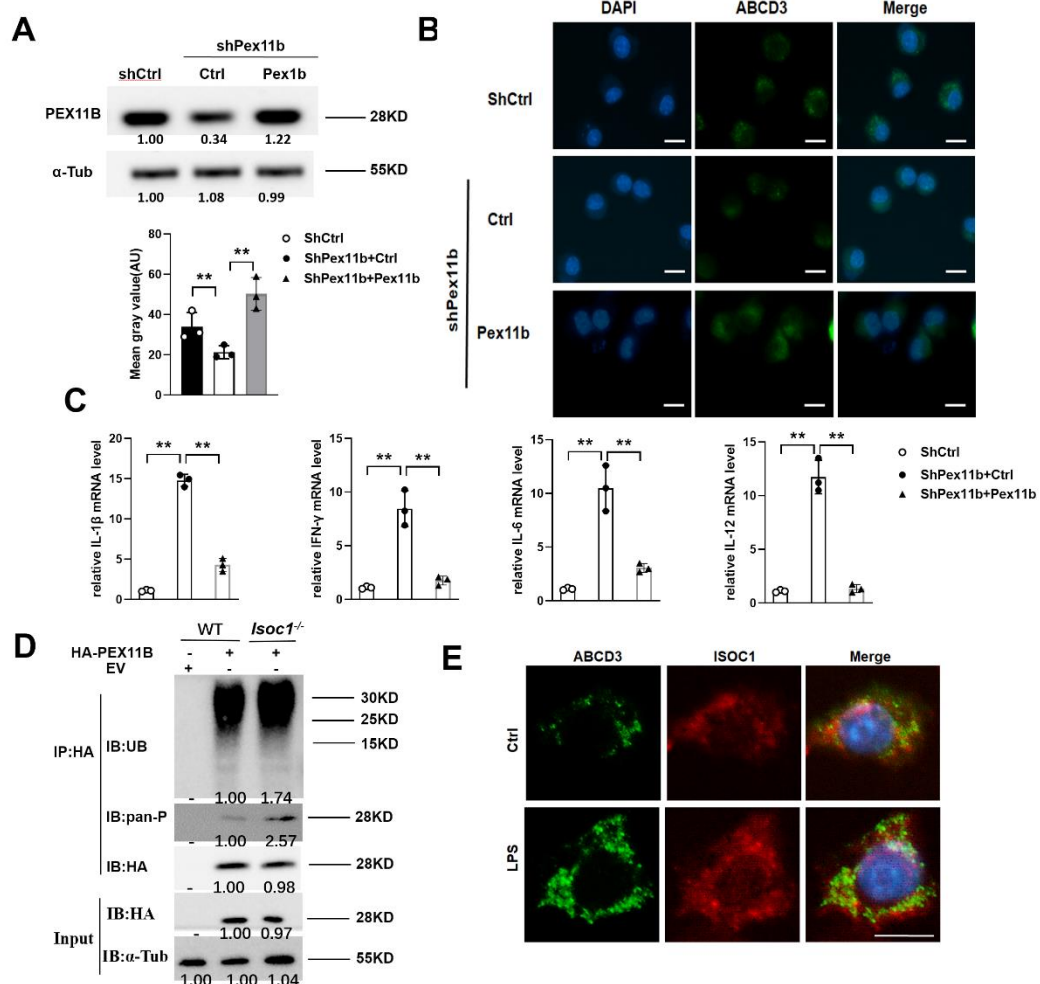

**Figure S2. Pex11b knockdown resulted in decreased peroxisomes and enhanced inflammatory response.**

**A** Knockdown efficiency of Pex11b was validated by WB. **B** Peroxisomes were labeled with ABCD3 and were observed with fluorescence microscopy after Pex11b knockdown upon LPS treatments. Scale bar = 10  $\mu$ m. Mean gray value were analyzed by Image J. **C** qRT-PCR was used to detect the expression levels of IL-1 $\beta$ , IFN- $\gamma$ , IL-6, and IL-12 after Pex11b knockdown upon LPS treatments. All data are shown as mean  $\pm$  s.e.m. (n = 3). **D** WT or *Isoc1*<sup>-/-</sup> cells were transfected with pCMV-HA or HA-labeled PEX11B, and stimulated with LPS for 24h. Phosphorylation and ubiquitination levels of pex11b were detected by Co-IP. **E** Co-localization of peroxisomes (labeled with ABCD3) and ISOC1 in RAW 264.7 cells upon LPS treatment were observed with fluorescence microscopy. Scale bar =10  $\mu$ m. \*\**P*<0.01. Student t test was used for data analysis.
